# Supplementary material for: Chicken MBD4 Regulates Immunoglobulin Diversification by Somatic Hypermutation
Source: PubMed Central journal article supplement (PMC6838969; doi:10.3389/fimmu.2019.02540), 2019-11-01
Supplement: Presentation_1.pdf [file Presentation_1.pdf]

**MBD4<sup>+/+</sup>** Leader  
 TTCTCCCCTCTCTCCTCTCCCT**T**CCAGGTTCCCTGGTGCAG**GGCAGCGCTGACTCAGCCGGCCTCGGTGTCAGCAAACCCAGGAGAA**

**MBD4<sup>Δ/Δ</sup>**

**MBD4<sup>+/+</sup>** CDR1  
 ACCGTCAAGATCACCT**TGCT**CCGGGGGTGGCAGCTAT**TGCTGGAAAGTTACTATTATGGCTGGTACCAGCAGAAGTCTCCTGGCAGTGCC**

**MBD4<sup>Δ/Δ</sup>** C11.1  
 C11.3 \*T

**MBD4<sup>+/+</sup>** CDR2  
 CCTGTCACTGTGATCTATG**AACAACGACAAGAGACCCTCGG**ACATCCCTTCACGATTCTCC**GGTTCCAAATCCGGCTCCACAGCCACA**

**MBD4<sup>Δ/Δ</sup>** C11.1  
 C11.3  
 C11.4 \*T  
 C11.5  
 C11.7  
 C11.8  
 C11.10  
 C11.12

**MBD4<sup>+/+</sup>** CDR3  
 TTA**ACC**ATCACTGGGGTCCG**AGCC**GATGACGAG**GGCT**GTCTATTCTGTGG**AGCT**ACGAAGACAACAGTGG**TGCTGCA**TTTGGGGCC

**MBD4<sup>Δ/Δ</sup>**

**MBD4<sup>+/+</sup>**  
 GGGACA**ACC**CTGACCGTCCTAGGTGAGTCGCTGACCTCGTCT

**MBD4<sup>Δ/Δ</sup>**

**Suppl. Figure 1. SHM in the IgL gene of MBD4<sup>Δ/Δ</sup>.11 subclones.** The leader and CDR1, CDR2 and CDR3 motifs in the reference sequence are boxed. Mutations are from MBD4<sup>Δ/Δ</sup>.11 (n=8, green). AID hotspot motifs (RGYW, WRCY) are highlighted in bold.

**MBD4<sup>+/+</sup>** Leader  
 TTCTCCCCTCTCTCCTCTCCCTTCCAGGTTCCCTGGTGCA**GGCAGCGCTGACTCAGCCGGCCTCGGTGT**AGCAA**ACCAGGAGAA**

**MBD4<sup>Δ/Δ</sup>**

**MBD4<sup>+/+</sup>** CDR1  
 ACCGTC AAGATCACCT**GGCT**CCGGGGTGGCAGCTAT**TGCTGGAAAGTT**ACTATTAT**GGCTGGTACCAGC**AGAAGTCTCCT**GGCAGTGCC**

**MBD4<sup>Δ/Δ</sup>** C12.1 G  
 C12.2 G  
 C12.3 G  
 C12.4 G  
 C12.5 G  
 C12.6 G  
 C12.7 G  
 C12.8 G  
 C12.9 G  
 C12.10 G  
 C12.11 G  
 C12.12 G

**MBD4<sup>+/+</sup>** CDR2  
 CCTGTCACTGTGATCTATG**AACAACGACAAGAGACCC**TGGACATCCCTTCACGATTCCTCC**GGTTCCAAATCCGGCTCCACAGCCACA**

**MBD4<sup>Δ/Δ</sup>**

**MBD4<sup>+/+</sup>** CDR3  
 TTA**ACC**ATCACTGGGGTCCG**AGCCG**ATGACGAG**GGCT**GTCTATTCTGTGG**AGCTACGAAGACAACAGTGGTGGCTGCA**TTTGGGGCC

**MBD4<sup>Δ/Δ</sup>** C12.9 TG-A T A

**MBD4<sup>+/+</sup>**  
 GGGACA**ACC**CTGACCGTCCCTAGGTGAGTCGCTGACCTCGTCT

**MBD4<sup>Δ/Δ</sup>**

**Suppl. Figure 2. SHMs occur in the IgL gene of MBD4<sup>Δ/Δ</sup>.12 subclones.** The leader and CDR1, CDR2 and CDR3 motifs in the reference sequence are boxed. Mutations are from MBD4<sup>Δ/Δ</sup>.12 (n=12, blue) below the reference sequence. AID hotspot motifs (RGYW, WRCY) are highlighted in bold.

**MBD4<sup>+/+</sup>** Leader  
 TTCTCCCCTCTCTCCTCTCCCTTCCAGGTTCCCTGGTGCAG**GGCAGCGCTGACTCAGCCGGCCTCGGTGTCAGCAAACCAGGAGAA**

**MBD4<sup>Δ/Δ</sup>**

**MBD4<sup>+/+</sup>** CDR1  
 ACCGTCAAGATCACCT**GGCT**CCGGGGGTGGCAGCTAT**TGCTGGAAGTTACTATTATGGCT**GGTACCAGCAGAAGTCTCCT**GGCAGTGCC**

**MBD4<sup>Δ/Δ</sup>**

C14.1 A  
 C14.2 A  
 C14.3 A  
 C14.4 A  
 C14.5 A  
 C14.6 A  
 C14.7 A  
 C14.8 A  
 C14.9 A  
 C14.10 A  
 C14.11 A  
 C14.12 A

**MBD4<sup>+/+</sup>** CDR2  
 CCTGTCACTGTGATCTATG**AACAACGACAAGAGACCCTCGG**ACATCCCTCAGATTCTCC**GGTTCCAAATCCGGCTCCACAGCCACA**

**MBD4<sup>Δ/Δ</sup>**

C14.10 C

**MBD4<sup>+/+</sup>** CDR3  
 TTA**ACC**ATCACTGGGGTCCG**AGCC**GATGACGAG**GGCT**GTCTATT**TCTGTGGAGCTACGAAGACAACAGTGGTGGCTGCA**TTTGGGGCC

**MBD4<sup>Δ/Δ</sup>**

C14.1 A  
 C14.2 A  
 C14.4 A  
 C14.6 A  
 C14.8 A  
 C14.9 A  
 C14.11 A  
 C14.12 A

**MBD4<sup>+/+</sup>**

GGGACA**ACC**CTGACCGTCTAGGTGAGTCGCTGACCTCGTCT

**MBD4<sup>Δ/Δ</sup>**

**Suppl. Figure 3. SHMs occur largely at G/C residues in the IgL gene of MBD4<sup>Δ/Δ</sup> subclones.**

The leader and CDR1, CDR2 and CDR3 motifs in the reference sequence are boxed. Mutations are from MBD4<sup>Δ/Δ</sup>.14 (n=12, red) deletion clones, below the reference sequence. AID hotspot motifs (RGYW, WRCY) are highlighted in bold.

**MBD4<sup>+/+</sup>** Leader  
 TTCTCCCTCTCTCCTCTCCCTTCCAGGTTCCCTGGTGCAG**GGC**AGCGCTGACTC**AGCC**GGCCTCGGTGTC**AGCAA**ACCAGGAGAA

-----  
**MBD4<sup>Δ/Δ</sup>** WT.12 A  
 WT.11 A  
 WT.9 A  
 WT.8 A  
 WT.6 A  
 WT.5 A  
 WT.4 A  
 WT.3 A  
**MBD4<sup>+/+</sup>** WT.2 CDR1 A  
 WT.1 A  
 A**CCG**TCAAGATCACCT**TGCT**CCGGGGTGGCAGCTA**TGCT**GGAA**AGT**TA**CT**ATTAT**GGC**TGGTACC**AGC**AGAAGTCTCCT**GGC**AGT**GCC**

**MBD4<sup>Δ/Δ</sup>**

**MBD4<sup>+/+</sup>** CDR2  
 CCTGTCACTGTGATCTATG**AACA**CGACAAGAGAC**CC**TCCGACATCCCTTCACGATTCTCC**GGTT**CCAAATCC**GGCT**CCAC**AGCC**ACA

-----  
**MBD4<sup>Δ/Δ</sup>** WT.12 T  
 WT.11 T  
 WT.9 T A  
 WT.8 T C  
 WT.6 T A  
 WT.5 T A  
 WT.4 T  
**MBD4<sup>+/+</sup>** WT.3 T  
 WT.2 T A  
 WT.1 T  
 TTA**ACC**ATCACTGGGGTCCG**AGCC**GATGACG**AGGCT**GTCTAT**TCT**GTGGG**AGCT**ACGAAGACAACAGTGGT**TGCT**GCATT**T**TGGGGCC

**MBD4<sup>Δ/Δ</sup>**

**MBD4<sup>+/+</sup>**  
 GGGACA**ACC**CTGACCGTCC**TAG**GTGAGTCGCTGACCTCGTCT

**MBD4<sup>Δ/Δ</sup>**

**Suppl. Figure 4. SHMs occur in the IgL gene of MBD4<sup>+/+</sup> subclones.** The leader and CDR1, CDR2 and CDR3 motifs in the reference sequence are boxed. Mutations are from the parental (n=11, black; above the reference sequence). AID hotspot motifs (RGYW, WRCY) are highlighted in bold.
